# Supplementary material
Source: publisher site journal article supplement (https://www.dovepress.com/article/324412)
Supplement: Supplementary file 1 [file get_supplementary_file.php]

**Supplementary**

**Table 1. Country of Origin**

| Country | Number of candidates |
| --- | --- |
| INDIA | 46 |
| Pakistan | 18 |
| Iraq | 9 |
| Philippines | 8 |
| Sri Lanka | 6 |
| Nigeria | 3 |
| Sudan | 3 |
| Malaysia | 2 |
| Nepal | 2 |
| South africa | 2 |
| Iran | 1 |
| Italy | 1 |
| Kenya | 1 |
| Netherlands | 1 |
| Norway | 1 |
| Ondis | 1 |
| Papua New Guinea | 1 |
| Poland | 1 |
| Sierra Leone | 1 |
| Sweden | 1 |
| Switzerland | 1 |
| USA | 1 |

**Table 2. Year of commencing WBA Program**

| Year | Candidates |
| --- | --- |
| 2019 | 28 |
| 2012 | 18 |
| 2013 | 15 |
| 2016 | 15 |
| 2018 | 15 |
| 2010 | 14 |
| 2011 | 11 |
| 2015 | 11 |
| 2017 | 9 |
| 2020 | 8 |
| 2014 | 6 |

**Table 3. Candidates Comments: (Raw Data)**

| **Candidate Comments** |
| --- |
| Amazing program |
| Amazing team, I am glad that I was lucky enough to be in this network and didn't have to struggle with the AMC |
| Best program, best people I am very thankful |
| Best Programme. Well supported |
| Dr Nair, you are amazing. Thanks |
| Excellent program for img |
| Excellent Comprehensive program |
| Excellent program |
| Excellent program to help doctors and to help health workforce |
| Fantastic comprehensive detailed program |
| Fantastic program which allowed me to finally be recognised in Australia. I could not be more grateful. |
| Forever grateful for the WBA program. It was a true career-saver at the time. |
| Good course, learnt a lot |
| Good learning experience |
| Good program |
| Good program aimed to assess candidates comprehensively |
| Great program with lots of support |
| Great program, very educational |
| Great program. Helped me complete AMC and get General registration. |
| happy and grateful that I could participate. Believe it is a thorough assessment of clinically relevant skills required to work successfully in Aus |
| Having been able to complete the requirements for the AMC Clinical exam through the WBA program was a faster route towards General Registration. |
| I always recommended WBA to my IMG colleagues . |
| I am so grateful to have been introduced to the WBA program |
| I am still thankful for everyone participate in WBA as it changed our courier pathway |
| I am very lucky to be the part of WBA programme. Please continue this because this is the real examination of medical professionalat this level. Not t |
| I am very thankful for getting into WBA program, it feels more realistic for me to talk to an actual patient than a pretend one |
| I believe WBA is more realistic and practical way of assessing IMGs. AMC clinical exam standards are very strict, difficult to be passed by graduates. |
| I found the Wba team with prof v supportive and helpful. I have recommended this programme to all foreign drs looking to get their general registration |
| I think the program was great with every mini CEX our case-based discussion the examiner provided great feedback and I think that has helped me improve |
| It is a good programme and support for IMG |
| It is wonderful program. 1 suggestion, it would be great if there are some formal teaching classes for during WBA process. |
| It is wonderful programme well suited for the immigrants. We are grateful to the Professor and his team |
| It was a very good program and helped us to gain our general registration without interruption of our work and family commitments. |
| It was a very well-structured assessment program. |
| It was wonderful program, and was well organised |
| It would be good to have a WBA candidates’ group for all the current/previous WBA candidates to interact and support each |
| It's a wonderful program and we are grateful for the help and guidance |
| It's an important program for IMGs and should continue. |
| loved the consultants/staff specialists who were assessors. Everything was coordinated really well by Lynette! I did want to give some fback will call |
| Make the program accessible for doctors in the area health general practices who have cleared their part 1 AMC exam |
| Many thanks |
| Nursing/num evaluation for the candidates is bit vague and may not reflect the doctor's clinical skills |
| Opportunity for people who is not working to do the WBA |
| Overall satisfied |
| Really greatful for this program. Great support from the whole health district. Would love to come back at some stage. |
| Some assessments were unfair |
| Thank you |
| The program is valuable and one of the best available. My main issue surrounds the mandated 6 months of employment with HNE prior to be accepted. |
| The programme is great, hardworking IMG's benefit from it, maybe a reunion would be nice |
| The WBA is a great program to suit the needs for doctors while working and satisfying the AMC / AHPRA requirements. |
| The WBA program helped me very much. I felt supported and performed better in the assessments. Now, I can contribute to the Australian health system. |
| The WBA program is an excellent clinical pathway. The clinical scenarios were patients in hospital and relevant to the clinical exam |
| The WBA program was the best and the people who runs the program are very approachable and helpful. |
| Very Grateful to Prof Nair and coordinating team for the huge support and motivation to achieve the Goal |
| Very helpful |
| Very helpful program |
| Very helpful programme for IMG, better assessment process than AMC clinical exam |
| Wanted to thank Professor Nair, Dr Usha, Lynette, Kathy, Julie and all WBA staff at HNELHD. I am feeling gratitude to the IMG unit. |
| Was great |
| Wba ,excellent program, Thanks a lot Prof & the team for running this program-best wishes to everyone |
| WBA an excellent examination |
| WBA helped me to get my full registration and Prof Nair and Team are very helpful to complete the programme |
| WBA in Hunter/New England is very organised and structured. Candidate is well able to balance between study and work. Admin staff is very helpful. |
| WBA is an excellent program run by Prof. NAIR and his team. It provides you with great feedback about working in the Australian Health system. |
| WBA is a good platform for overseas trained doctors to comply with the requirements of AMC, I think it should be expanded to other areas as well. |
| WBA is a much better assessment than AMC clinical exam |
| WBA is an excellent program |
| WBA is by far the most effective method of assessing candidates. |
| WBA is excellent program and very useful for IMG. Dr Nair and his team are extremely helpful. |
| WBA is useless organisation and should be closed |
| WBA program allowed me to get general registration and get into the GP training in 2015 |
| WBA program is a true reflection of the knowledge and experience we gain in the Australian Health System. |
| WBA program should be held at least twice a year, should be more streamlined bid a bid with AMC requirements regarding the types of cases. |
| WBA program was exceptionally well administered, it set clear expectation and provided support. |
| WBA program worked as an educational experience and helped with better integration into Australian health system |
| WBA should be accessible to everyone |
| WBA should be available to all IMDs |
| WBA should continue |
| WBA was a fair, comprehensive assessment |
| WBA was a great learning experience which helped me complete my supervised practise successfully and achieve specialist registration |
| WBA was an excellent opportunity for AMC graduates to get general registration after full completion of the course. It was a great course! |
| WBA was the door that opened so many opportunities for my professional career. |
